# Supplementary material
Source: publisher site journal article supplement (https://www.spandidos-publications.com/1255/downloadSupplementary)
Supplement: Supplementary file 1 [file downloadSupplementary]

Table SI. Primer sequences used for reverse transcription-quantitative PCR.

| Primer name | Sequence (5'-3')       |                      |
|-------------|------------------------|----------------------|
|             | Forward                | Reverse              |
| PD1L1       | ATTTGCTGAACGCCCCATAC   | TGCTTGCCAGATGACTTCG  |
| p21         | TCAGAGGAGGTGAGAGAGCG   | ACATGGCGCCTGCCG      |
| p27         | G TTCACGATGTCCGACGAGG  | ATCCACTTGCAGACCGCTT  |
| ADAM17      | GTTTCAGTTTGCAGTCTCC    | TGAACAAGCTCTTCAGGTGG |
| GADPH       | ACCCATCACCATCTTCCAGGAG | GAAGGGGCGGAGATGATGAC |

PD1L1, programmed cell death 1 ligand 1; ADAM17, ADAM metallopeptidase domain 17.
